# Supplementary material
Source: publisher site journal article supplement (https://www.dovepress.com/article/329084)
Supplement: Supplementary file 1 [file get_supplementary_file.php]

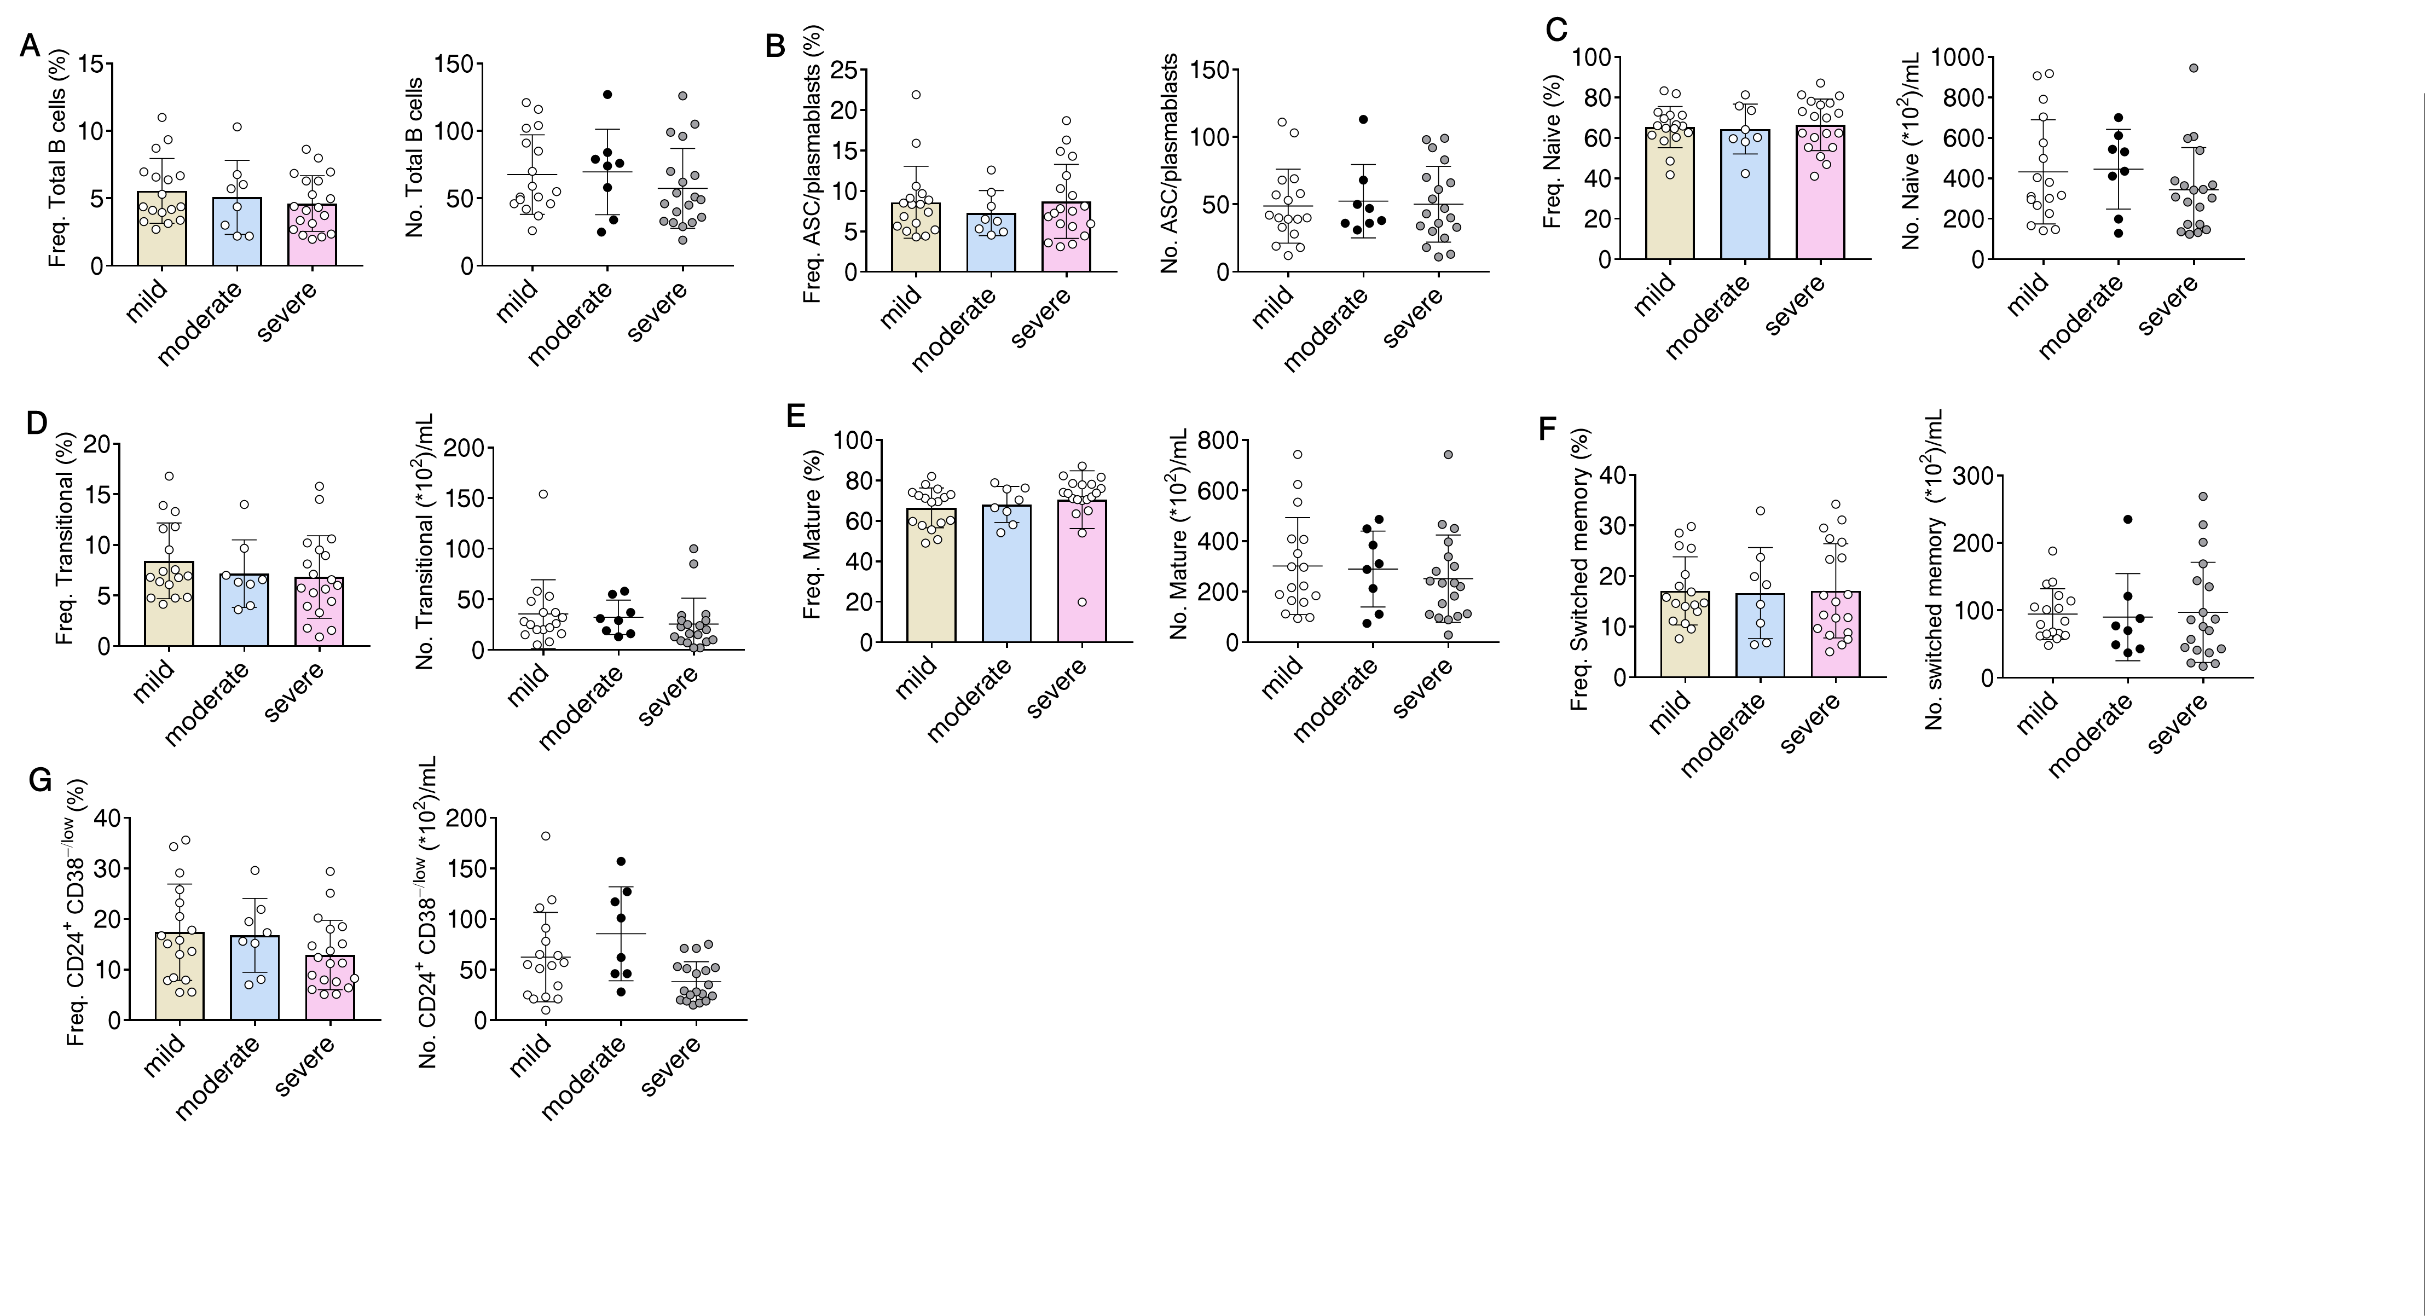


**Supplementary Figure 1. B cell subsets in different clinical groups of glaucoma patients.** The severity of glaucoma was determined as in **Figure 5**. The frequency (Freq.) and absolute number (No.) of (**A**) total B cells, (**B**) ASC/plasmablasts, (**C**) naïve, (**D**) transitional, (**E**) mature, (**F**) switched memory, and (**G**) CD24+ CD38-/low subpopulations in 3 clinical categories of glaucoma patients. Statistic differences were determined by one-way analysis of variance (ANOVA) followed by Bonferroni Correction. The data are represented as means ± SD.


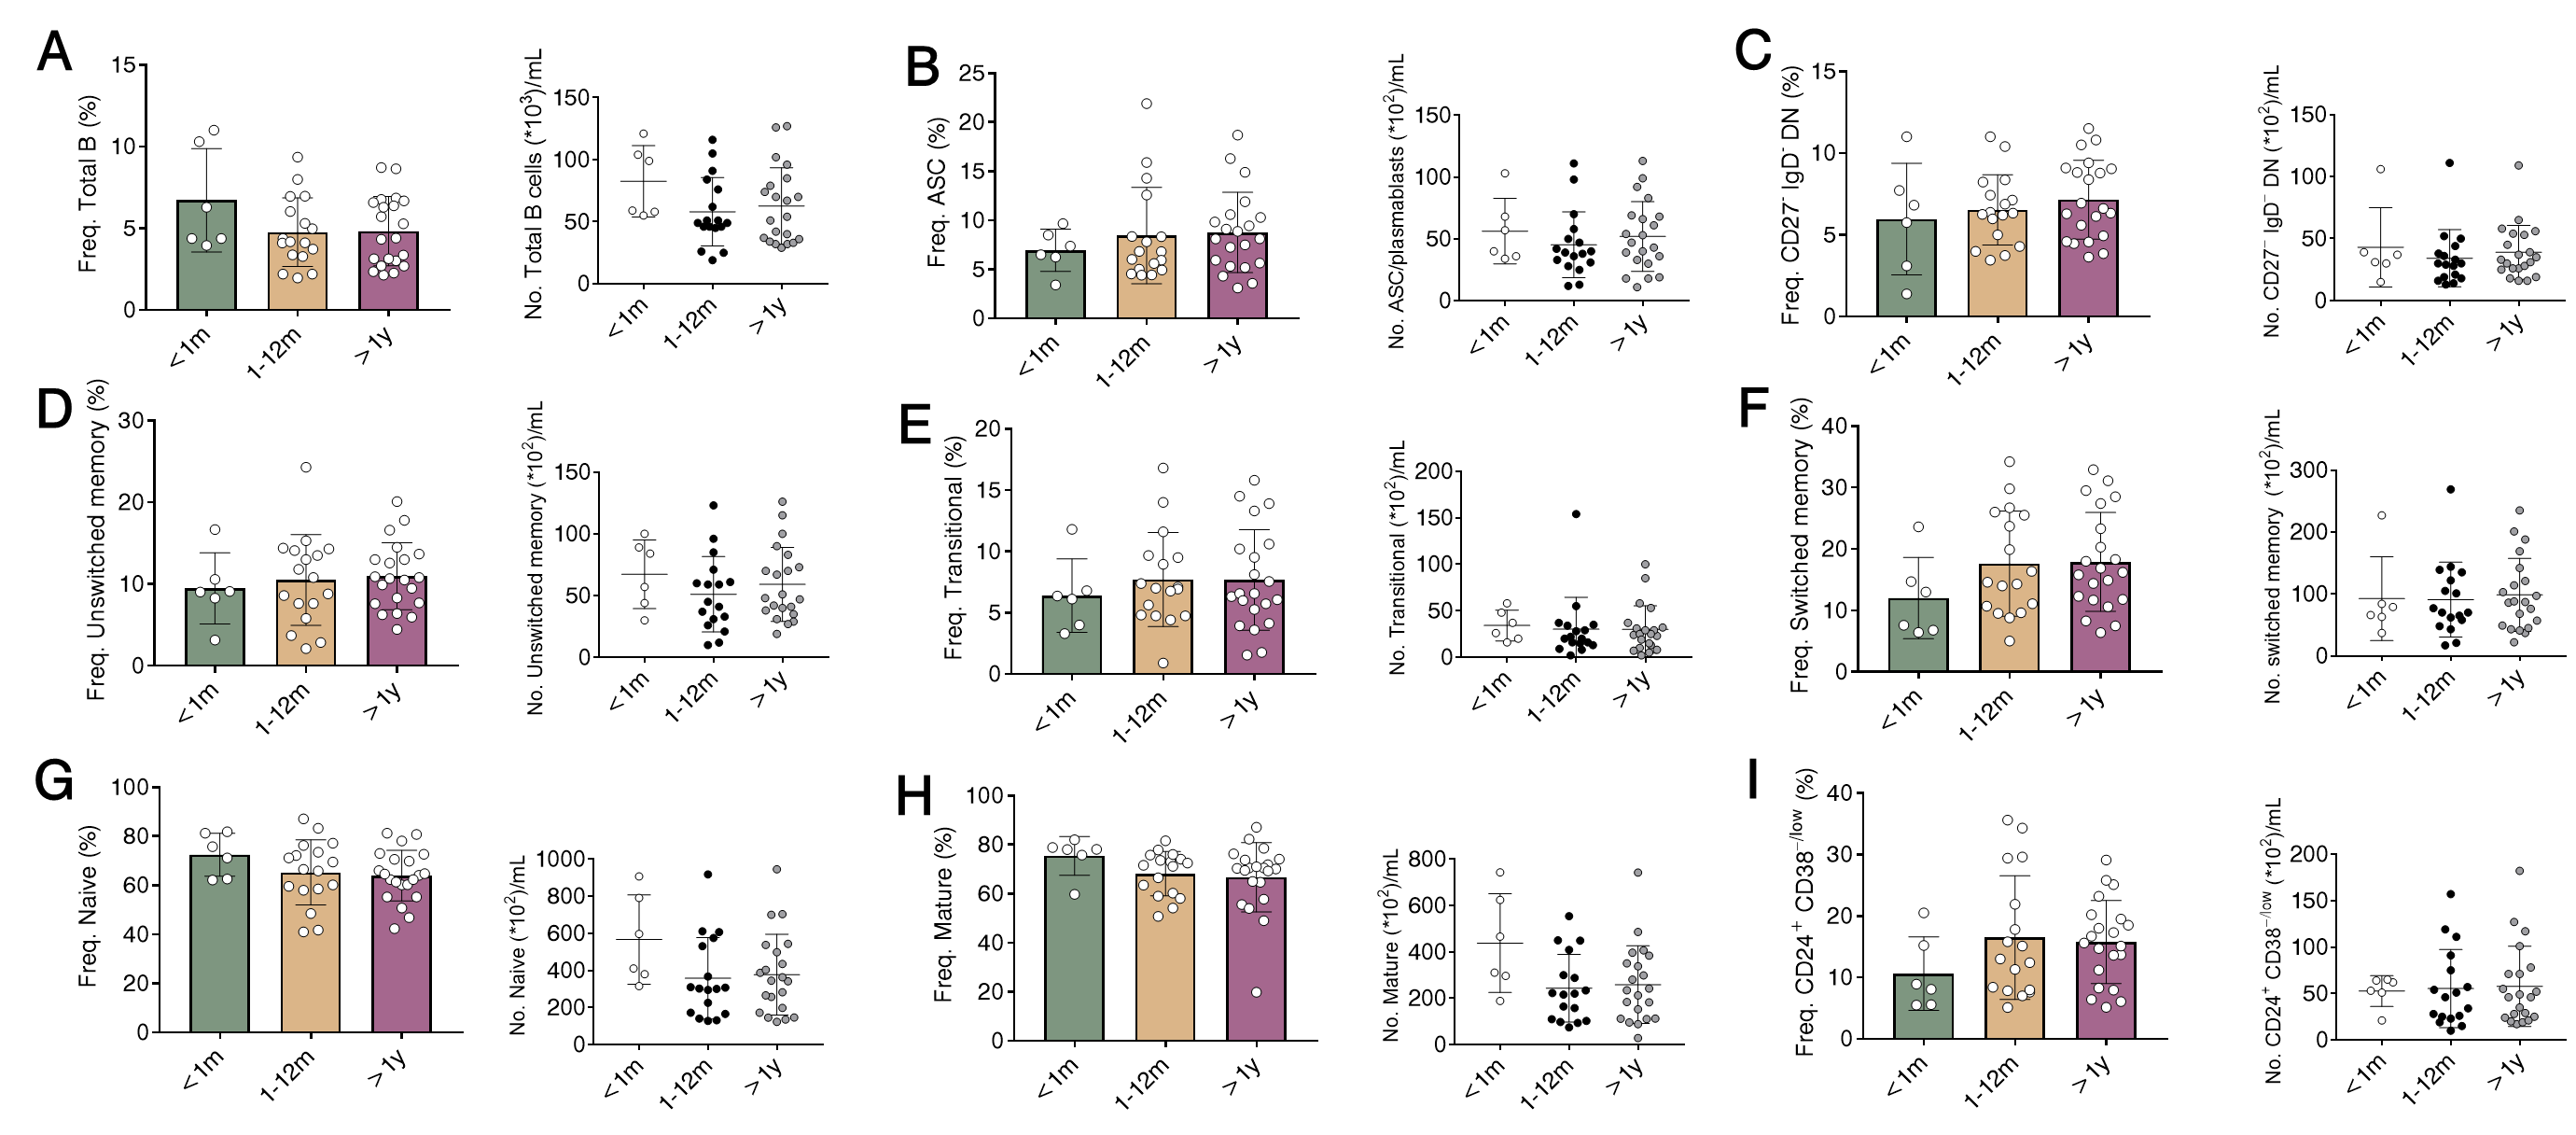


**Supplementary Figure 2. B cell subsets in glaucoma patients with different disease duration.** Patients were divided into 3 groups based on their disease duration: 1, duration of shorter than 1 month (n=6); 2, 1-12 months (n=17); 3, longer than 1 year (n=21). The frequency and absolute number of (**A**) total B cells, (**B**) ASC/plasmablasts, (**C**) CD27- IgD- DN, (**D**) unswitched memory, (**E**)transitional, (**F**) switched memory, (**G**) naïve, (**H**) mature, and (**I**) CD24+ CD38-/low subpopulations in 3 groups of glaucoma patients with different disease duration. Statistic differences were determined by one-way analysis of variance (ANOVA) followed by Bonferroni Correction. The data are represented as means ± SD.

**Supplementary Table 1. B cell subsets in different clinical types of glaucoma**

| **Cell type** | **PACG** | **Freq. (%)** | **POAG** | **Freq. (%)** | ***P* value** a |
| --- | --- | --- | --- | --- | --- |
| **No. (*102/mL)** | **No. (*102/mL)** |
| Total B | 5.02 ± 2.39 | | 5.33 ± 1.4 | | 0.7650 |
| 660.63 ± 300.65 | | 480.66 ± 195.48 | | 0.1728 |
| ASC/plasmablasts | 8.26 ± 4.24 | | 9.35 ± 3.43 | | 0.5592 |
| 50.69 ± 27.09 | | 46.29 ± 23.65 | | 0.7152 |
| Naïve | 66.04 ± 11.72 | | 63.18 ± 8.36 | | 0.5778 |
| 417.36 ± 229.11 | | 262.2 ± 123.24 | | 0.1205 |
| Mature | 67.17 ± 12.03 | | 70.52 ± 8.34 | | 0.6551 |
| 295.46 ± 176.99 | | 165.4 ± 65.62 | | 0.0892 |
| Transitional | 7.46 ± 3.76 | | 7.82 ± 3.79 | | 0.8333 |
| 32.17 ± 28.44 | | 20.92 ± 18.28 | | 0.3644 |
| CD24+ CD38-/low | 15.34 ± 8.15 | | 15.35 ± 7.59 | | 0.9990 |
| 56.21 ± 39.15 | | 55.42 ± 37.56 | | 0.9640 |
| Unswitched memory | 10.74 ± 4.88 | | 9.66 ± 1.94 | | 0.6033 |
| 58.54 ± 28.76 | | 48.86 ± 31.92 | | 0.4651 |
| Switched memory | 16.47 ± 7.99 | | 20.43 ± 7.58 | | 0.2727 |
| 96.54 ± 60.73 | | 83.77 ± 41.54 | | 0.6297 |
| CD27- IgD- DN | 6.76 ± 2.42 | | 6.73 ± 2.4 | | 0.9818 |
| 37.46 ± 24.07 | | 39.65 ± 14.97 | | 0.8332 |

Data are presented as mean ± SD when applicable.

Abbreviations: PACG, primary angle-closure glaucoma; POAG, primary open-angle glaucoma; Freq, frequency; No, number; ASC, antibody-secreting cells; DN, double negative

a Student’s t test (unpaired, two-tailed)
